# Supplementary material for: Production of antiviral “OP7 chimera” defective interfering particles free of infectious virus
Source: Springer Nature journal article supplement (doi:10.1007/s00253-023-12959-6), 2024-01-13
Supplement: MOESM1 [file 253_2023_12959_MOESM1_ESM.pdf]

**Journal: “Applied Microbiology and Biotechnology”**

**Manuscript title: “Production of antiviral “OP7 chimera” defective interfering particles free of infectious virus”**

**Lars Pelz<sup>1</sup>, Tanya Dogra<sup>1</sup>, Pavel Marichal-Gallardo<sup>1</sup>, Marc Dominique Hein<sup>2</sup>, Ghada Hemissi<sup>1</sup>, Sascha Young Kupke<sup>1,\*</sup>, Yvonne Genzel<sup>1,\*</sup>, Udo Reichl<sup>1,2</sup>**

<sup>1</sup>Max Planck Institute for Dynamics of Complex Technical Systems, Bioprocess Engineering, Magdeburg, Germany

<sup>2</sup>Otto von Guericke University Magdeburg, Bioprocess Engineering, Magdeburg, Germany

**\*Correspondence:**

Sascha Y. Kupke

kupke@mpi-magdeburg.mpg.de

Yvonne Genzel

genzel@mpi-magdeburg.mpg.de

## Supplementary Material

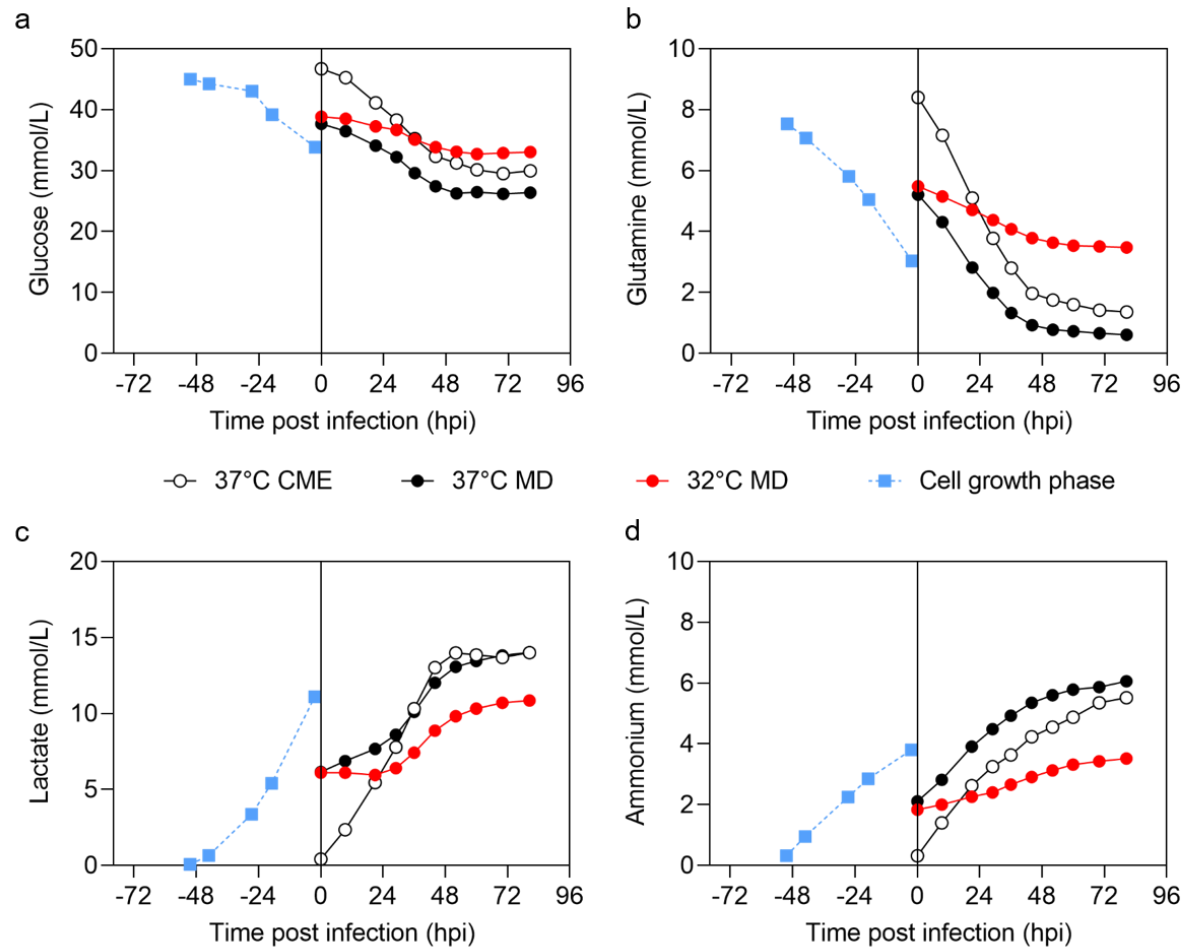

**Fig. S1** Extracellular metabolite concentrations for batch-mode production of OP7 chimera DIPs in shake flasks (Fig. 2). **a)** Glucose, **b)** glutamine, **c)** lactate, and **d)** ammonium concentrations. MDCK-PB2(sus) cells, cultivated in 250 mL shake flasks (100 mL  $V_W$ ) at 37°C, were grown to about  $4.0 \times 10^6$  cells/mL. Subsequently, the suspension culture was diluted (MD, 1:2) with fresh medium (100 mL  $V_W$ ), cells were infected at a MOI of  $1E-4$  and temperature was reduced to 32°C. For comparison, two cultivations were performed at 37°C, one with MD at an optimal MOI of  $1E-3$ , one with complete medium exchange (CME) at an optimal MOI of  $1E-4$ .

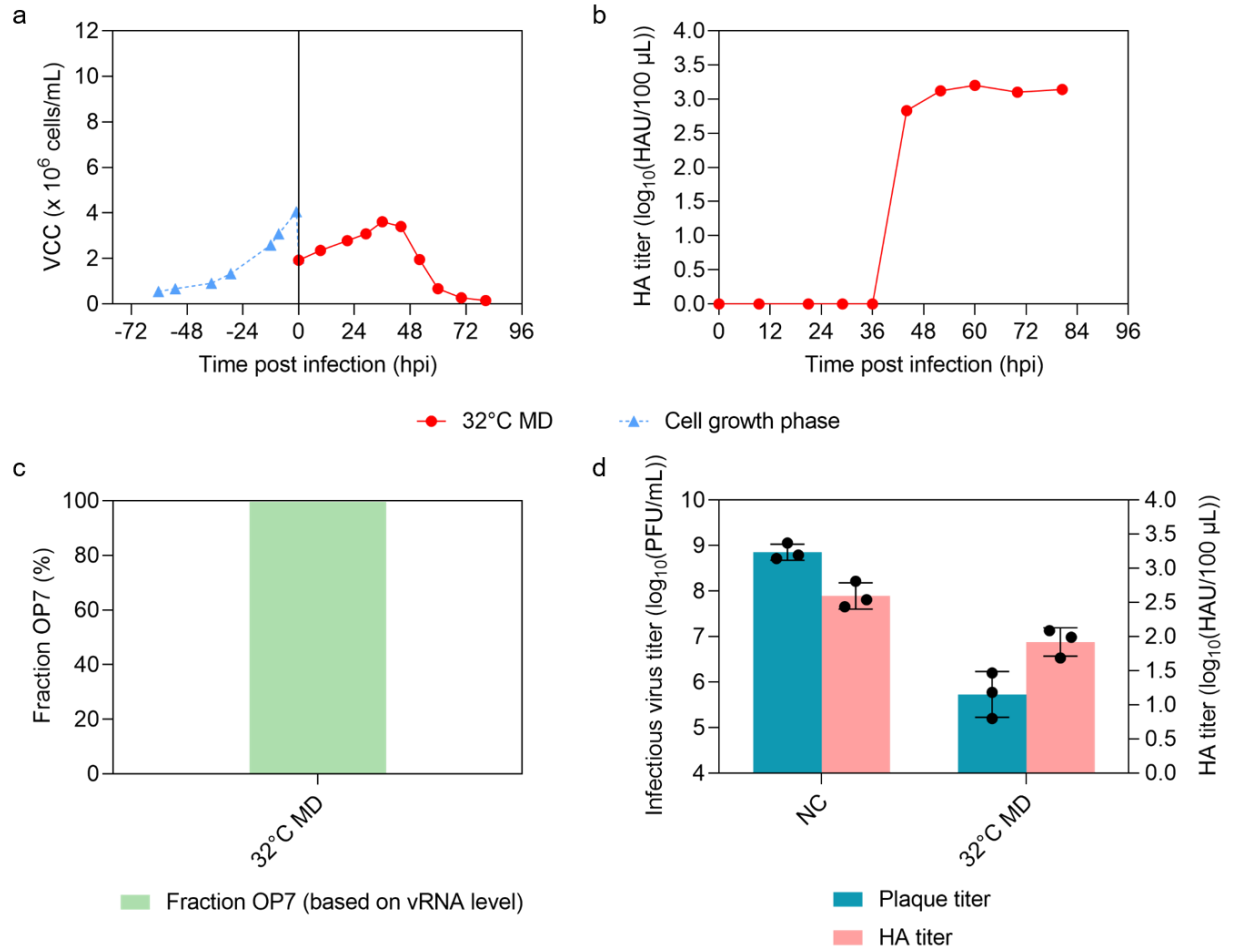

**Fig. S2** Second independent batch-mode production of OP7 chimera DIPs in shake flasks. MDCK-PB2(sus) cells, cultivated in 250 mL shake flasks (100 mL  $V_w$ ) at 37°C, were grown to about  $4.0 \times 10^6$  cells/mL. Subsequently, the suspension culture was diluted (MD, 1:2) with fresh medium (100 mL  $V_w$ ), cells were infected at a MOI of 1E 4 and temperature was reduced to 32°C. **a**) VCC. **b**) HA titer. **c**) OP7 chimera DIP fraction. **a**, **b** and **c** depict the results of one experiment. The optimal harvest time point was analyzed for **c** and **d** (32°C MD: 44 hpi). **d**) Interference assay with MDCK(adh) cells was performed in three independent experiments. Error bars indicate the SD.

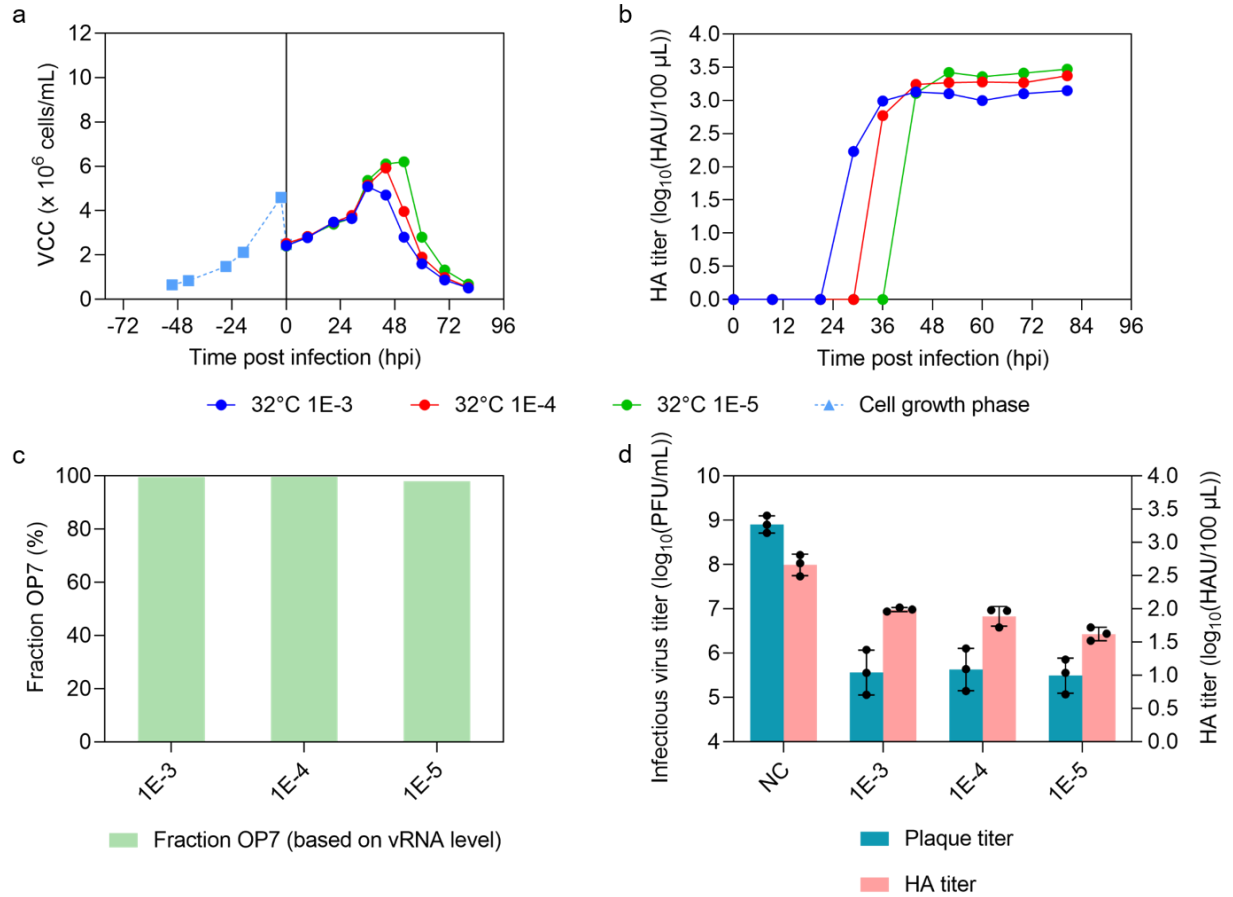

**Fig. S3** Batch-mode production of OP7 chimera DIPs in shake flasks (also see Fig. 2) at three different MOIs. MDCK-PB2(sus) cells, cultivated in 250 mL shake flasks (100 mL  $V_w$ ) at 37°C, were grown to about  $4.0 \times 10^6$  cells/mL. Subsequently, the suspension culture was diluted (MD, 1:2) with fresh medium (100 mL  $V_w$ ), cells were infected at a MOI of 1E-3, 1E-4 or 1E-5 and temperature was reduced to 32°C. **a**) VCC. **b**) HA titer. **c**) Fraction of OP7 chimera DIPs. **a-c** depict the results of one experiment. **d**) Interference assay with MDCK(adh) cells was performed in three independent experiments. Error bars indicate the SD. The optimal harvest time point (1E-3: 36 hpi, 1E-4: 44 hpi; 1E-5: 52 hpi) was analyzed for **c** and **d**.

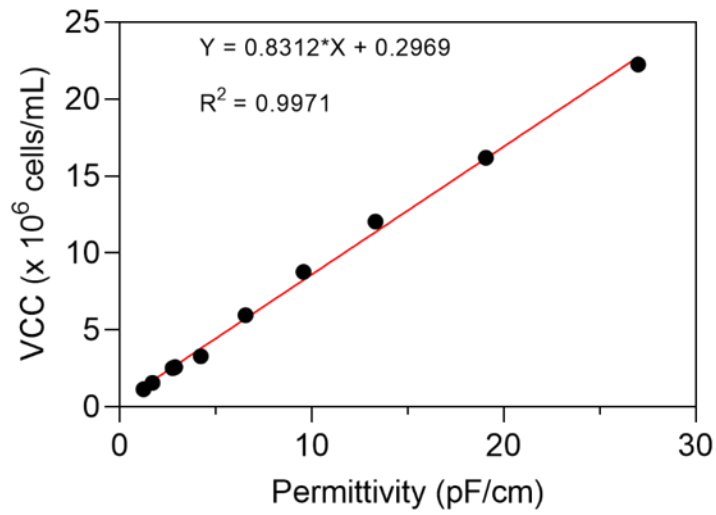

**Fig. S4** Linear regression of VCC and permittivity signal during OP7 chimera DIP production in perfusion culture. MDCK-PB2(sus) cells were grown in a 1 L stirred tank bioreactor (700 mL V<sub>w</sub>). Perfusion started after 24 h of batch-mode using an alternating tangential flow filtration system (ATF2) with a hollow fiber membrane. The estimated VCC was used to the control perfusion rate during cell growth.
